# Supplementary material
Source: Research Square preprint supplement (doi:10.21203/rs.3.rs-9453126/v1)
Supplement: Supplementary file 1 [file b07e65334f6bf9696d885d2c.pdf]

# Supplementary Information

## Contents

|    |                                                                 |    |
|----|-----------------------------------------------------------------|----|
| S1 | Experimental dataset evaluation                                 | 1  |
| S2 | Category based Leave-one-material-out split                     | 1  |
| S3 | Analysis of feature space                                       | 2  |
| S4 | Experimental setup                                              | 2  |
| S5 | Experimental results on random splits                           | 3  |
| S6 | Experimental results on domain-based splits                     | 3  |
| S7 | Classical machine learning baselines on learned representations | 14 |
| S8 | Experimental results on atomic encoding SHAP values of SVR      | 14 |

## S1 Experimental dataset evaluation

Supplementary Figure 1 is a supplement to Fig. 1b–d. It further shows the distributions of computational PBE and experimental bandgap data across material categories used in this paper. The comparison indicates that the experimental dataset is dominated by chalcogenides, which have been actively investigated as wide-bandgap semiconductors due to their tunable electronic properties and relevance to optoelectronic applications. As a result, models trained primarily on computational data may learn biased representations when applied without sufficient experimental supervision. The data are categorized according to the standard in Supplementary Table 1.

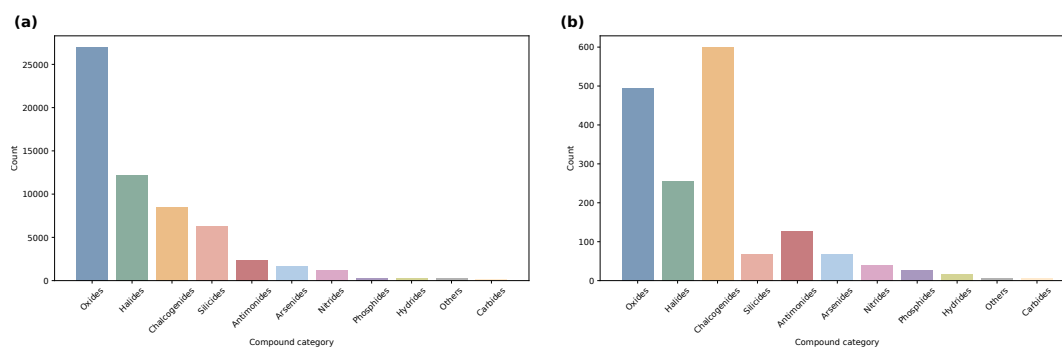

**Supplementary Figure 1.** **a**, Number of materials in the computational dataset for each material category. **b**, Number of materials in the experimental dataset for each material category.

**Supplementary Table 1.** Categorization of materials based on chemical composition.

|                       |           |             |           |              |                      |        |
|-----------------------|-----------|-------------|-----------|--------------|----------------------|--------|
| <b>Category</b>       | Arsenides | Antimonides | Silicides | Halides      | Chalcogenides        | Oxides |
| <b>Key element(s)</b> | As        | Sb          | Si        | F, Cl, Br, I | S, Se, Te            | O      |
| <b>Category</b>       | Nitrides  | Phosphides  | Carbides  | Hydrides     | Others               |        |
| <b>Key element(s)</b> | N         | P           | C         | H            | Not classified above |        |

## S2 Category based Leave-one-material-out split

The LOMO split uses the categorization scheme defined in Supplementary Table 1. Compounds that belong to multiple categories are removed to ensure that each split is mutually exclusive and to prevent distribution leakage. As shown in Supplementary Table 2, only 1254 crystals are retained for the LOMO setting. Supplementary Table 3 further summarizes the number of compounds in each category.

**Supplementary Table 2.** Category distribution showing the number of categories each compound belongs to, including those that do not belong to any category.

| Category # | 1    | 2   | 3  | Not belong to any |
|------------|------|-----|----|-------------------|
| Count      | 1254 | 406 | 38 | 7                 |

**Supplementary Table 3.** Number of compounds in each category.

| Category | Chalcogenides | Oxides   | Halides   | Nitrides  | Phosphides |
|----------|---------------|----------|-----------|-----------|------------|
| Count    | 486           | 481      | 159       | 36        | 27         |
| Category | Antimonides   | Hydrides | Arsenides | Silicides | Carbides   |
| Count    | 18            | 16       | 16        | 8         | 7          |

### 23 S3 Analysis of feature space

24 In this paper, we adopt the fixed-dimensional material representations extracted from CGCNN as the feature space. To examine  
25 how the target property is organized under this representation, we analyze the distribution of experimental bandgap values  
26 in the corresponding  $t$ -SNE embedding. From Supplementary Figure 2, we observe that the bandgap values vary smoothly  
27 across the embedded space, with higher bandgaps predominantly located on one side of the manifold and lower bandgaps on  
28 the opposite side.

29 Although the representation method employed does not explicitly encode detailed geometric or topological information, it  
30 captures the statistical frequency of different atom species and coarse-grained interatomic distance information. These factors  
31 are well known to play a dominant role in determining the overall electronic properties of materials and can significantly limit  
32 the range of bandgap values.

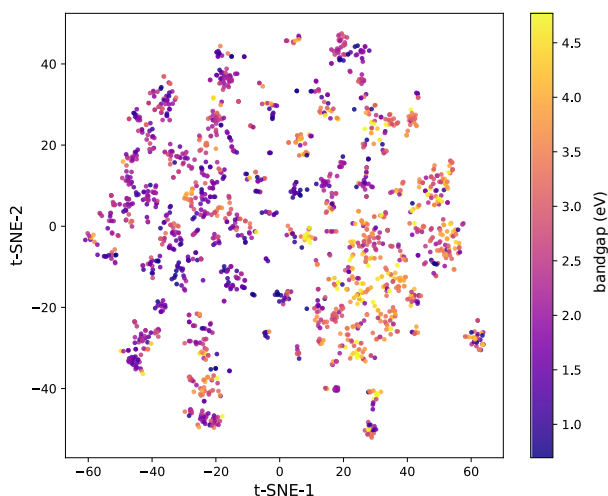

**Supplementary Figure 2.**  $t$ -SNE visualization of the CGCNN-derived feature representation, with points colored by bandgap values.

### 33 S4 Experimental setup

34 All deep models were trained using stochastic gradient descent (SGD) with a learning rate of  $10^{-3}$ , momentum of 0.9, and a  
35 batch size of 64. A fixed random seed (42) was used for reproducibility. Model checkpointing was performed based on the  
36 lowest validation MRE. Pretraining runs used 200 epochs, while all downstream tasks were trained for 100 epochs. For each  
37 data split or fold, models were re-initialized and trained independently on a single GPU when available. The architecture and  
38 configurations of the GNN models are summarised in Supplementary Table 4. Hyperparameter tuning is applied to the classical  
39 machine learning models, with details provided in Supplementary Table 5.

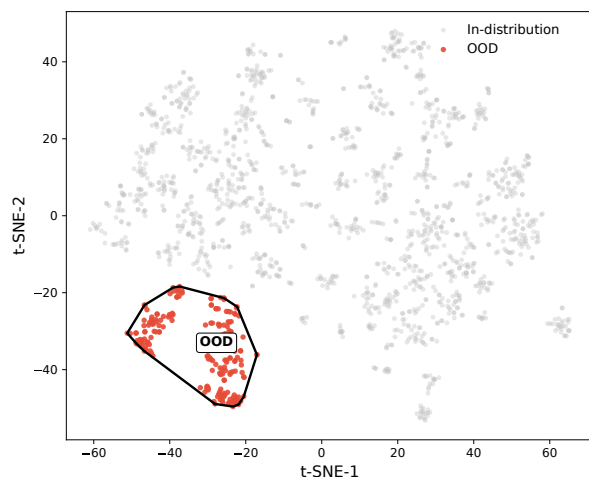

**Supplementary Figure 3.** *t*-SNE projection of crystal graph embeddings from the experimental dataset. An isolated cluster of materials, automatically selected using density-based clustering, is highlighted in red and designated as out-of-distribution (OOD), while the remaining samples form the in-distribution region (grey).

## 40 S5 Experimental results on random splits

41 To more directly quantify the impact of computational pretraining, Supplementary Figure 4 presents the difference in MRAE  
 42 between models trained without and with pretraining across different fractions of the experimental training data. The metric is  
 43 defined as  $\Delta\text{MRAE} = \text{MRAE}(\text{without pretraining}) - \text{MRAE}(\text{with pretraining})$ , such that positive values indicate performance  
 44 improvements from pretraining, whereas negative values indicate performance degradation. This representation provides a  
 45 complementary view to Fig. 2, highlighting how the benefit of pretraining varies across architectures and training data regimes.

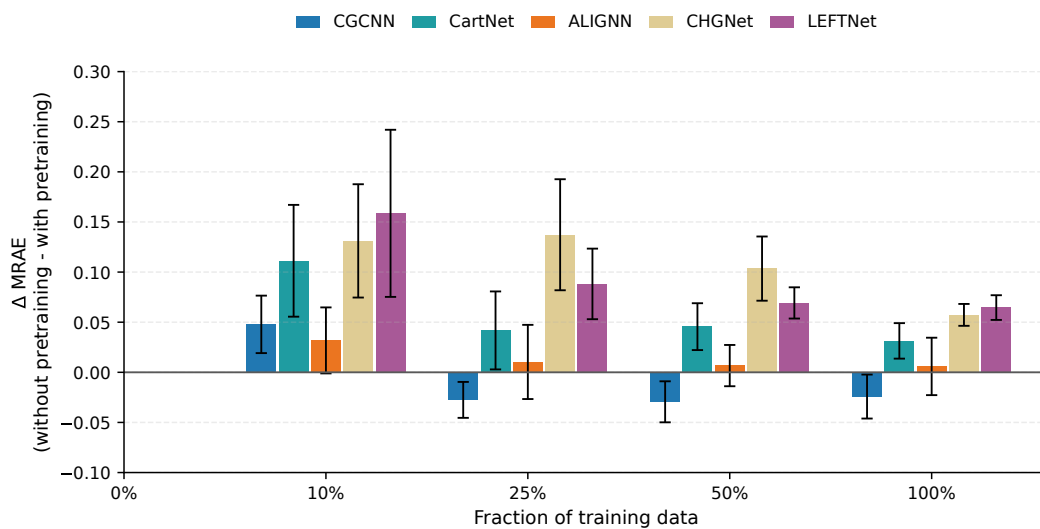

**Supplementary Figure 4. Effect of pretraining across different data fractions.** Difference in MRAE between models trained without and with computational pretraining across different experimental data fractions. Positive values indicate improved performance from pretraining. Error bars denote propagated standard deviation.

## 46 S6 Experimental results on domain-based splits

47 Across the LOMO split (Supplementary Table 6, Supplementary Table 7 and Supplementary Table 8), silicides and antimonides  
 48 show larger prediction errors than others for nearly all architectures and metrics. These indicate poor generalization when these

**Supplementary Table 4.** Key architectural and graph construction configurations of the GNN models used in this study.

| Model   | Configuration                      | Value |
|---------|------------------------------------|-------|
| CGCNN   | Atom embedding dimension           | 64    |
|         | Hidden dimension                   | 128   |
|         | Number of convolution layers       | 3     |
|         | Number of output layers            | 1     |
| ALIGNN  | Hidden dimension                   | 128   |
|         | Number of ALIGNN layers            | 4     |
|         | Number of GCN layers               | 4     |
|         | Number of Gaussian basis functions | 40    |
|         | Atom cutoff radius (Å)             | 6.0   |
|         | Bond cutoff radius (Å)             | 3.0   |
| CHGNet  | Atom feature dimension             | 64    |
|         | Bond feature dimension             | 64    |
|         | Angle feature dimension            | 64    |
|         | Number of convolution layers       | 4     |
|         | Radial basis size                  | 31    |
|         | Angular basis size                 | 31    |
| LEFTNet | Hidden channels                    | 128   |
|         | Number of layers                   | 4     |
| CartNet | Input dimension                    | 256   |
|         | Radial basis dimension             | 64    |
|         | Number of layers                   | 4     |
|         | Maximum neighbors                  | 12    |
|         | Cutoff radius (Å)                  | 8.0   |

49 material families are excluded from training. This trend is further illustrated by the error heatmaps in Supplementary Figure 5  
50 and Supplementary Figure 6, which visualize prediction errors for the two most challenging categories.

51 The results also reveal architecture-dependent robustness under category-level distribution shift. For instance, ALIGNN  
52 maintains relatively stable MRAE across most categories in the pretraining setting (generally  $\sim 0.3$ – $0.5$ ), whereas CGCNN and  
53 LEFTNet show larger performance variance across chemical families.

54 Pretraining does not consistently improve performance under LOMO split. In the difficult categories (silicides and  
55 antimonides), pretraining sometimes increases error. For example, CGCNN MRAE on silicides increases from 0.867 (without  
56 pretraining) to 2.661 (with pretraining), and LEFTNet shows similarly large silicide errors in both settings.

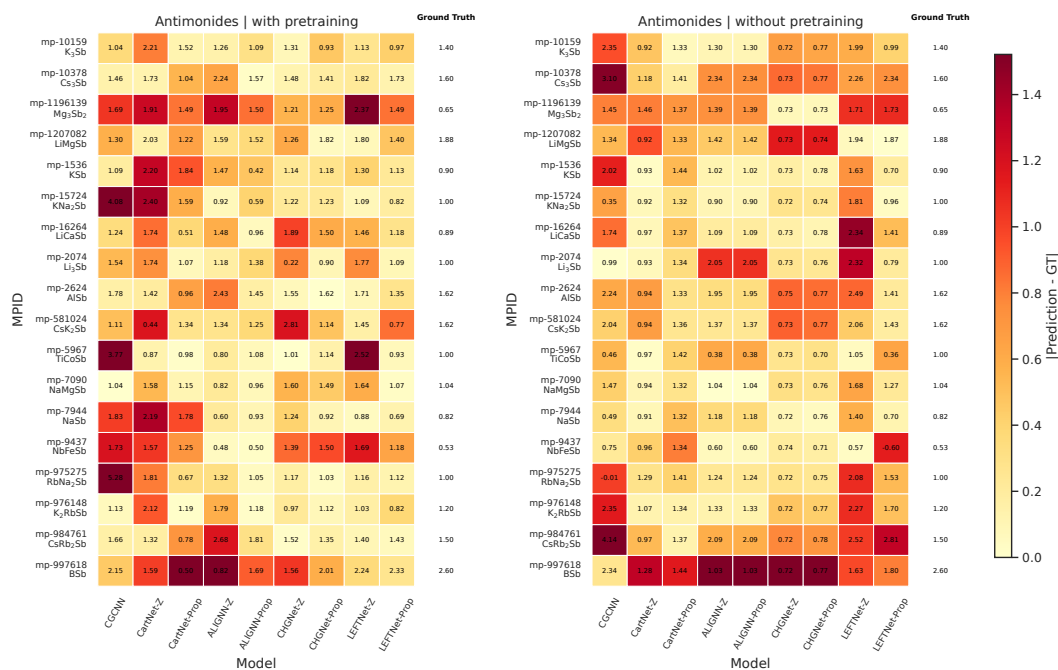

**Supplementary Figure 5.** Heatmap of bandgap prediction errors for the antimonides split. The left and right panels correspond to models with and without computational pretraining, respectively. Color indicates the absolute error  $|\text{Prediction} - \text{GT}|$ , where GT denotes the ground-truth bandgap. Each cell is annotated with the predicted bandgap, and the rightmost column lists the ground-truth bandgap for each Materials Project ID (MPID).

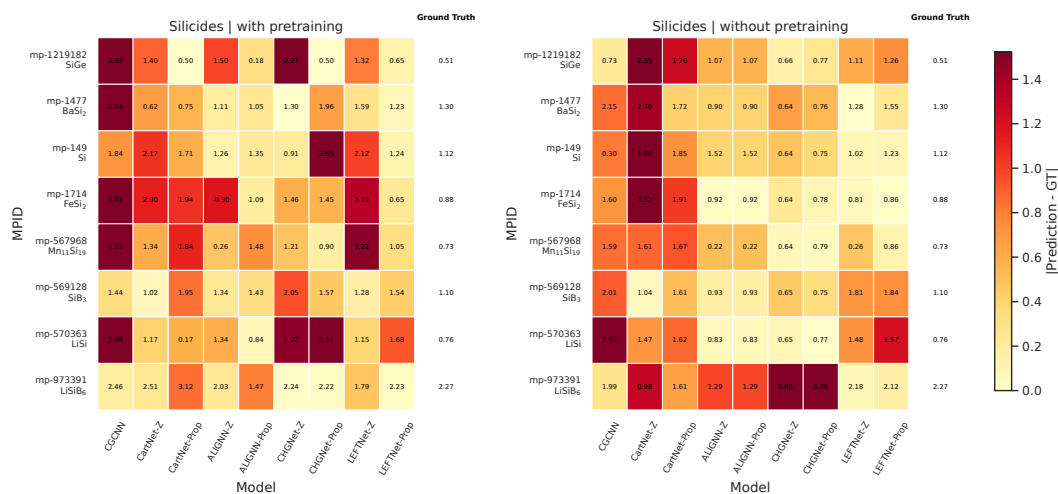

**Supplementary Figure 6.** Heatmap of bandgap prediction errors for the silicides split. The left and right panels correspond to models with and without computational pretraining, respectively. Color indicates the absolute error  $|\text{Prediction} - \text{GT}|$ , where GT denotes the ground-truth bandgap. Each cell is annotated with the predicted bandgap, and the rightmost column lists the ground-truth bandgap for each Materials Project ID (MPID).

**Supplementary Table 5.** Hyperparameter search space for classical machine learning models on the random split task. Bold values indicate the configuration selected based on the lowest validation MRAE and used for reporting test performance. Linear regression has no tunable hyperparameters under our setup and is therefore omitted from this table.

| Model         | Hyperparameter               | Candidate values                   |
|---------------|------------------------------|------------------------------------|
| SVR           | Regularization $C$           | 1, <b>10</b> , 100                 |
|               | RBF kernel width $\gamma$    | 0.01, <b>0.1</b> , 1               |
|               | $\epsilon$ -insensitive loss | 0.01, <b>0.1</b> , 0.5             |
|               | Kernel type                  | <b>rbf</b> , linear, poly, sigmoid |
| Random Forest | Number of trees              | 200, 400, <b>800</b>               |
|               | Maximum depth                | <b>None</b> , 10, 20               |
|               | Min. samples for split       | <b>2</b> , 4, 8                    |
|               | Min. samples per leaf        | <b>1</b> , 2, 4                    |

**Supplementary Table 6.** MRAE scores of each model on the LOMO split. For each category, that category is left out as the test set. Standard deviation is not reported because this split uses a single fold. All values are reported to three decimal places.

**With pretraining**

| Model   | Antimonides | Arsenides | Carbides | Chalcogenides | Halides | Hydrides | Nitrides | Oxides | Phosphides | Silicides |
|---------|-------------|-----------|----------|---------------|---------|----------|----------|--------|------------|-----------|
| CGCNN   | 0.988       | 0.502     | 0.590    | 0.329         | 0.391   | 0.357    | 0.447    | 0.493  | 0.375      | 2.661     |
| CartNet | 0.716       | 0.401     | 0.250    | 0.318         | 0.422   | 0.542    | 0.824    | 0.371  | 0.435      | 0.619     |
| ALIGNN  | 0.448       | 0.358     | 0.190    | 0.312         | 0.367   | 0.307    | 0.496    | 0.332  | 0.324      | 0.664     |
| CHGNet  | 0.443       | 0.470     | 0.236    | 0.279         | 0.410   | 0.355    | 0.444    | 0.287  | 0.369      | 0.972     |
| LEFTNet | 0.555       | 0.498     | 0.255    | 0.269         | 0.363   | 0.299    | 0.488    | 0.286  | 0.369      | 0.896     |

**Without pretraining**

| Model   | Antimonides | Arsenides | Carbides | Chalcogenides | Halides | Hydrides | Nitrides | Oxides | Phosphides | Silicides |
|---------|-------------|-----------|----------|---------------|---------|----------|----------|--------|------------|-----------|
| CGCNN   | 0.680       | 0.546     | 0.214    | 0.397         | 0.405   | 0.375    | 0.535    | 0.342  | 0.430      | 0.867     |
| CartNet | 0.387       | 0.358     | 0.106    | 0.365         | 0.370   | 0.379    | 0.467    | 0.351  | 0.323      | 1.072     |
| ALIGNN  | 0.350       | 0.289     | 0.207    | 0.342         | 0.449   | 0.392    | 0.408    | 0.314  | 0.376      | 0.400     |
| CHGNet  | 0.376       | 0.426     | 0.157    | 0.372         | 0.385   | 0.427    | 0.468    | 0.344  | 0.388      | 0.360     |
| LEFTNet | 0.687       | 0.620     | 0.199    | 0.447         | 0.441   | 0.395    | 0.465    | 0.334  | 0.291      | 0.457     |
| LR      | 0.805       | 0.708     | 0.373    | 0.409         | 0.485   | 1.013    | 0.561    | 0.354  | 0.268      | 4.084     |
| RFR     | 0.792       | 0.484     | 0.243    | 0.366         | 0.440   | 0.453    | 0.717    | 0.350  | 0.371      | 1.523     |
| SVR     | 0.632       | 0.629     | 0.252    | 0.399         | 0.468   | 0.427    | 0.505    | 0.321  | 0.295      | 1.759     |

**Supplementary Table 7.** MAE scores of each model on the LOMO split. For each category, that category is left out as the test set. Standard deviation is not reported because this split uses a single fold. All values are reported to three decimal places.

**With pretraining**

| Model   | Antimonides | Arsenides | Carbides | Chalcogenides | Halides | Hydrides | Nitrides | Oxides | Phosphides | Silicides |
|---------|-------------|-----------|----------|---------------|---------|----------|----------|--------|------------|-----------|
| CGCNN   | 0.939       | 0.601     | 1.463    | 0.621         | 0.840   | 0.790    | 0.969    | 1.522  | 0.605      | 2.077     |
| CartNet | 0.768       | 0.517     | 0.635    | 0.601         | 0.879   | 0.966    | 1.295    | 1.040  | 0.637      | 0.573     |
| ALIGNN  | 0.528       | 0.449     | 0.499    | 0.593         | 0.899   | 0.827    | 0.870    | 0.862  | 0.526      | 0.505     |
| LEFTNet | 0.472       | 0.567     | 0.631    | 0.511         | 0.710   | 0.609    | 0.939    | 0.728  | 0.515      | 0.748     |
| CHGNet  | 0.456       | 0.505     | 0.624    | 0.503         | 0.756   | 0.606    | 0.753    | 0.703  | 0.560      | 0.685     |

**Without pretraining**

| Model   | Antimonides | Arsenides | Carbides | Chalcogenides | Halides | Hydrides | Nitrides | Oxides | Phosphides | Silicides |
|---------|-------------|-----------|----------|---------------|---------|----------|----------|--------|------------|-----------|
| CGCNN   | 0.780       | 0.504     | 0.555    | 0.667         | 1.013   | 0.925    | 1.003    | 0.851  | 0.552      | 0.788     |
| CartNet | 0.477       | 0.430     | 0.329    | 0.726         | 0.968   | 1.071    | 1.092    | 1.003  | 0.461      | 0.941     |
| ALIGNN  | 0.426       | 0.345     | 0.526    | 0.656         | 1.153   | 1.046    | 0.827    | 0.754  | 0.601      | 0.393     |
| LEFTNet | 0.748       | 0.616     | 0.537    | 0.988         | 1.205   | 1.073    | 1.003    | 0.850  | 0.435      | 0.349     |
| CHGNet  | 0.540       | 0.415     | 0.480    | 0.644         | 0.932   | 1.239    | 1.181    | 0.945  | 0.598      | 0.474     |

**Supplementary Table 8.**  $R^2$  scores of each model on the LOMO split. For each category, that category is left out as the test set. Standard deviation is not reported because this split uses a single fold. All values are reported to three decimal places.

| With pretraining |             |           |          |               |         |          |          |        |            |           |
|------------------|-------------|-----------|----------|---------------|---------|----------|----------|--------|------------|-----------|
| Model            | Antimonides | Arsenides | Carbides | Chalcogenides | Halides | Hydrides | Nitrides | Oxides | Phosphides | Silicides |
| CGCNN            | -8.422      | -1.559    | -6.931   | -0.063        | -0.263  | 0.284    | -0.122   | -2.758 | -0.122     | -29.173   |
| CartNet          | -2.259      | -1.617    | -0.259   | 0.113         | -0.441  | -0.157   | -2.432   | -0.655 | -0.129     | -0.970    |
| ALIGNN           | -1.045      | -0.637    | 0.026    | 0.041         | -0.487  | 0.106    | 0.152    | -0.205 | 0.098      | -0.514    |
| CHGNet           | -0.452      | -1.564    | -0.269   | 0.319         | -0.064  | 0.524    | 0.230    | 0.065  | -0.034     | -2.279    |
| LEFTNet          | -0.959      | -1.207    | -0.223   | 0.282         | 0.106   | 0.619    | -0.149   | 0.072  | 0.018      | -1.997    |

  

| Without pretraining |             |           |          |               |         |          |          |        |            |           |
|---------------------|-------------|-----------|----------|---------------|---------|----------|----------|--------|------------|-----------|
| Model               | Antimonides | Arsenides | Carbides | Chalcogenides | Halides | Hydrides | Nitrides | Oxides | Phosphides | Silicides |
| CGCNN               | -2.969      | -1.651    | 0.000    | -0.131        | -0.756  | 0.002    | -0.086   | -0.163 | 0.028      | -2.059    |
| CartNet             | -0.621      | -0.363    | 0.379    | -0.353        | -0.749  | -0.433   | -0.567   | -0.568 | 0.327      | -3.952    |
| ALIGNN              | -0.414      | 0.237     | -0.061   | -0.169        | -1.223  | -0.224   | 0.081    | 0.044  | 0.011      | 0.078     |
| CHGNet              | -1.083      | -0.260    | -0.278   | -0.072        | -0.516  | -0.720   | -0.655   | -0.424 | -0.081     | -0.742    |
| LEFTNet             | -2.017      | -1.821    | -0.436   | -1.314        | -1.547  | -0.308   | -0.138   | -0.172 | 0.327      | 0.206     |
| LR                  | -2.867      | -2.823    | -1.118   | 0.062         | -1.106  | -8.971   | -0.759   | 0.065  | 0.274      | -55.401   |
| RFR                 | -1.998      | -0.927    | -0.080   | 0.050         | -0.383  | 0.052    | -0.162   | -0.622 | 0.240      | -5.759    |
| SVR                 | -2.079      | -1.914    | -0.304   | -0.551        | -1.341  | 0.044    | 0.078    | -0.054 | 0.275      | -8.261    |

**Supplementary Table 9.** Average MRAE under the LOMO split by category, comparing PBE computational errors with GNN models (excluding classical machine learning models) trained with pretraining and without pretraining.

| Category      | PBE   | Models with pretraining | Models without pretraining |
|---------------|-------|-------------------------|----------------------------|
| Antimonides   | 1.358 | 0.590                   | 0.496                      |
| Arsenides     | 1.157 | 0.450                   | 0.448                      |
| Carbides      | 0.250 | 0.321                   | 0.177                      |
| Chalcogenides | 0.502 | 0.301                   | 0.384                      |
| Halides       | 0.440 | 0.398                   | 0.410                      |
| Hydrides      | 0.484 | 0.389                   | 0.394                      |
| Nitrides      | 0.633 | 0.542                   | 0.469                      |
| Oxides        | 0.340 | 0.355                   | 0.337                      |
| Phosphides    | 0.793 | 0.388                   | 0.362                      |
| Silicides     | 1.770 | 1.106                   | 0.631                      |

**Supplementary Table 10.** Model performance under different evaluation splits, reported as mean  $\pm$  standard deviation. Metrics include mean relative absolute error (MRAE), mean absolute error (MAE), and coefficient of determination ( $R^2$ ). Results are shown for models with and without computational pretraining where applicable. This is a supplement of Fig. 3c-f.

| Split                               | Model   | MRAE                            | MAE                             | $R^2$                           |
|-------------------------------------|---------|---------------------------------|---------------------------------|---------------------------------|
| Random split with pretraining       | CGCNN   | 0.295 <sub>(0.014)</sub>        | 0.603 <sub>(0.038)</sub>        | 0.235 <sub>(0.068)</sub>        |
|                                     | CartNet | 0.306 <sub>(0.009)</sub>        | 0.606 <sub>(0.042)</sub>        | 0.273 <sub>(0.062)</sub>        |
|                                     | ALIGNN  | 0.280 <sub>(0.013)</sub>        | 0.550 <sub>(0.030)</sub>        | 0.407 <sub>(0.051)</sub>        |
|                                     | CHGNet  | <b>0.242</b> <sub>(0.004)</sub> | <u>0.486</u> <sub>(0.005)</sub> | <u>0.487</u> <sub>(0.014)</sub> |
|                                     | LEFTNet | <u>0.242</u> <sub>(0.003)</sub> | <b>0.485</b> <sub>(0.007)</sub> | <b>0.507</b> <sub>(0.017)</sub> |
| Random split without pretraining    | CGCNN   | <u>0.271</u> <sub>(0.017)</sub> | 0.576 <sub>(0.019)</sub>        | 0.313 <sub>(0.051)</sub>        |
|                                     | CartNet | 0.337 <sub>(0.015)</sub>        | 0.738 <sub>(0.048)</sub>        | -0.342 <sub>(1.030)</sub>       |
|                                     | ALIGNN  | 0.286 <sub>(0.025)</sub>        | 0.586 <sub>(0.054)</sub>        | 0.369 <sub>(0.090)</sub>        |
|                                     | CHGNet  | 0.299 <sub>(0.010)</sub>        | 0.613 <sub>(0.022)</sub>        | 0.298 <sub>(0.056)</sub>        |
|                                     | LEFTNet | 0.307 <sub>(0.012)</sub>        | 0.616 <sub>(0.020)</sub>        | 0.246 <sub>(0.130)</sub>        |
|                                     | LR      | 0.332 <sub>(0.005)</sub>        | 0.637 <sub>(0.014)</sub>        | 0.306 <sub>(0.008)</sub>        |
|                                     | RFR     | 0.284 <sub>(0.005)</sub>        | <u>0.535</u> <sub>(0.007)</sub> | 0.453 <sub>(0.016)</sub>        |
|                                     | SVR     | <b>0.261</b> <sub>(0.007)</sub> | <b>0.510</b> <sub>(0.013)</sub> | <b>0.497</b> <sub>(0.018)</sub> |
| Chemical system with pretraining    | CGCNN   | <b>0.275</b> <sub>(0.029)</sub> | 0.562 <sub>(0.044)</sub>        | 0.411 <sub>(0.148)</sub>        |
|                                     | CartNet | 0.325 <sub>(0.051)</sub>        | 0.617 <sub>(0.076)</sub>        | 0.245 <sub>(0.285)</sub>        |
|                                     | ALIGNN  | 0.287 <sub>(0.033)</sub>        | 0.576 <sub>(0.063)</sub>        | 0.412 <sub>(0.118)</sub>        |
|                                     | CHGNet  | 0.287 <sub>(0.041)</sub>        | <u>0.531</u> <sub>(0.054)</sub> | <u>0.457</u> <sub>(0.146)</sub> |
|                                     | LEFTNet | <u>0.283</u> <sub>(0.042)</sub> | <b>0.529</b> <sub>(0.064)</sub> | <b>0.484</b> <sub>(0.135)</sub> |
| Chemical system without pretraining | CGCNN   | 0.302 <sub>(0.040)</sub>        | 0.601 <sub>(0.074)</sub>        | 0.345 <sub>(0.137)</sub>        |
|                                     | CartNet | 0.328 <sub>(0.034)</sub>        | 0.687 <sub>(0.069)</sub>        | 0.183 <sub>(0.271)</sub>        |
|                                     | ALIGNN  | <u>0.295</u> <sub>(0.045)</sub> | 0.594 <sub>(0.080)</sub>        | 0.398 <sub>(0.125)</sub>        |
|                                     | CHGNet  | 0.366 <sub>(0.037)</sub>        | 0.711 <sub>(0.135)</sub>        | 0.197 <sub>(0.306)</sub>        |
|                                     | LEFTNet | 0.331 <sub>(0.036)</sub>        | 0.614 <sub>(0.037)</sub>        | 0.372 <sub>(0.080)</sub>        |
|                                     | LR      | 0.361 <sub>(0.033)</sub>        | 0.660 <sub>(0.047)</sub>        | 0.328 <sub>(0.094)</sub>        |
|                                     | RFR     | 0.303 <sub>(0.044)</sub>        | <u>0.550</u> <sub>(0.061)</sub> | <b>0.494</b> <sub>(0.105)</sub> |
|                                     | SVR     | <b>0.294</b> <sub>(0.046)</sub> | <b>0.543</b> <sub>(0.059)</sub> | <u>0.477</u> <sub>(0.104)</sub> |
| Periodic groups with pretraining    | CGCNN   | 0.326 <sub>(0.074)</sub>        | 0.620 <sub>(0.096)</sub>        | 0.287 <sub>(0.192)</sub>        |
|                                     | CartNet | 0.345 <sub>(0.054)</sub>        | 0.669 <sub>(0.100)</sub>        | -0.169 <sub>(0.795)</sub>       |
|                                     | ALIGNN  | 0.334 <sub>(0.061)</sub>        | 0.640 <sub>(0.100)</sub>        | 0.263 <sub>(0.193)</sub>        |
|                                     | CHGNet  | <b>0.308</b> <sub>(0.058)</sub> | <b>0.566</b> <sub>(0.083)</sub> | <u>0.346</u> <sub>(0.258)</sub> |
|                                     | LEFTNet | <u>0.324</u> <sub>(0.097)</sub> | <u>0.579</u> <sub>(0.089)</sub> | <b>0.377</b> <sub>(0.174)</sub> |
| Periodic groups without pretraining | CGCNN   | 0.378 <sub>(0.077)</sub>        | <u>0.716</u> <sub>(0.083)</sub> | 0.096 <sub>(0.164)</sub>        |
|                                     | CartNet | 0.382 <sub>(0.083)</sub>        | <u>0.757</u> <sub>(0.092)</sub> | -0.035 <sub>(0.289)</sub>       |
|                                     | ALIGNN  | <b>0.342</b> <sub>(0.052)</sub> | <b>0.679</b> <sub>(0.103)</sub> | 0.179 <sub>(0.251)</sub>        |
|                                     | CHGNet  | <u>0.370</u> <sub>(0.052)</sub> | 0.764 <sub>(0.131)</sub>        | -0.057 <sub>(0.387)</sub>       |
|                                     | LEFTNet | 0.448 <sub>(0.183)</sub>        | 0.832 <sub>(0.191)</sub>        | -0.223 <sub>(0.490)</sub>       |
|                                     | LR      | 0.481 <sub>(0.113)</sub>        | 0.913 <sub>(0.261)</sub>        | -0.582 <sub>(0.885)</sub>       |
|                                     | RFR     | 0.386 <sub>(0.103)</sub>        | 0.683 <sub>(0.096)</sub>        | <b>0.228</b> <sub>(0.173)</sub> |
|                                     | SVR     | 0.400 <sub>(0.097)</sub>        | 0.773 <sub>(0.265)</sub>        | -0.051 <sub>(0.628)</sub>       |
| Crystal system with pretraining     | CGCNN   | 0.319 <sub>(0.084)</sub>        | 0.619 <sub>(0.130)</sub>        | 0.208 <sub>(0.402)</sub>        |
|                                     | CartNet | 0.343 <sub>(0.071)</sub>        | 0.672 <sub>(0.090)</sub>        | -0.104 <sub>(1.013)</sub>       |
|                                     | ALIGNN  | 0.298 <sub>(0.044)</sub>        | 0.579 <sub>(0.086)</sub>        | 0.431 <sub>(0.140)</sub>        |
|                                     | CHGNet  | <b>0.282</b> <sub>(0.046)</sub> | <b>0.538</b> <sub>(0.079)</sub> | <b>0.483</b> <sub>(0.128)</sub> |
|                                     | LEFTNet | <u>0.285</u> <sub>(0.053)</sub> | <u>0.557</u> <sub>(0.088)</sub> | <u>0.476</u> <sub>(0.105)</sub> |
| Crystal system without pretraining  | CGCNN   | 0.319 <sub>(0.046)</sub>        | 0.617 <sub>(0.098)</sub>        | 0.356 <sub>(0.163)</sub>        |
|                                     | CartNet | 0.333 <sub>(0.065)</sub>        | 0.746 <sub>(0.205)</sub>        | 0.019 <sub>(0.482)</sub>        |
|                                     | ALIGNN  | <b>0.304</b> <sub>(0.039)</sub> | 0.643 <sub>(0.125)</sub>        | 0.330 <sub>(0.213)</sub>        |
|                                     | CHGNet  | 0.375 <sub>(0.064)</sub>        | 0.708 <sub>(0.144)</sub>        | 0.237 <sub>(0.320)</sub>        |
|                                     | LEFTNet | 0.344 <sub>(0.046)</sub>        | 0.648 <sub>(0.081)</sub>        | 0.338 <sub>(0.151)</sub>        |
|                                     | LR      | 0.379 <sub>(0.076)</sub>        | 0.701 <sub>(0.130)</sub>        | 0.236 <sub>(0.286)</sub>        |
|                                     | RFR     | 0.318 <sub>(0.049)</sub>        | <u>0.587</u> <sub>(0.087)</sub> | <b>0.465</b> <sub>(0.085)</sub> |
|                                     | SVR     | <u>0.307</u> <sub>(0.044)</sub> | <b>0.575</b> <sub>(0.080)</sub> | <u>0.444</u> <sub>(0.123)</sub> |

**Supplementary Table 11.** Pretrained model performance on the experimental test set (best in bold, second best underlined).

| Model   | MAE ↓        | MRAE ↓       | $R^2$ ↑       |
|---------|--------------|--------------|---------------|
| ALIGNN  | <u>0.811</u> | <u>0.346</u> | -0.146        |
| CartNet | 0.913        | 0.395        | <u>-0.308</u> |
| CGCNN   | <b>0.627</b> | <b>0.295</b> | <b>0.271</b>  |
| CHGNet  | 1.456        | 0.589        | -2.531        |
| LEFTNet | 1.165        | 0.489        | -0.949        |

**Supplementary Table 12.** Performance of different models on the validation and test sets, reported as mean  $\pm$  standard deviation (best in bold, second best in underline). Higher values indicate better performance ( $\uparrow$ ), otherwise ( $\downarrow$ ).

| Model                                         | Validation set           |                          |                          | Test set                 |                          |                           |
|-----------------------------------------------|--------------------------|--------------------------|--------------------------|--------------------------|--------------------------|---------------------------|
|                                               | MAE(eV) ↓                | MRAE ↓                   | $R^2$ ↑                  | MAE(eV) ↓                | MRAE ↓                   | $R^2$ ↑                   |
| <i>Without pretraining (fine-tuning only)</i> |                          |                          |                          |                          |                          |                           |
| CGCNN                                         | 0.566 <sub>(0.044)</sub> | <b>0.277(0.030)</b>      | 0.425 <sub>(0.092)</sub> | 0.576 <sub>(0.019)</sub> | <u>0.271(0.017)</u>      | 0.313 <sub>(0.051)</sub>  |
| CartNet-Z                                     | 0.660 <sub>(0.092)</sub> | 0.322 <sub>(0.048)</sub> | 0.214 <sub>(0.221)</sub> | 0.738 <sub>(0.048)</sub> | <u>0.337(0.015)</u>      | -0.342 <sub>(1.030)</sub> |
| CartNet-Prop                                  | 0.655 <sub>(0.109)</sub> | 0.315 <sub>(0.057)</sub> | 0.054 <sub>(0.656)</sub> | 0.703 <sub>(0.067)</sub> | 0.312 <sub>(0.023)</sub> | -0.056 <sub>(0.434)</sub> |
| ALIGNN-Z                                      | 0.598 <sub>(0.056)</sub> | 0.299 <sub>(0.036)</sub> | 0.401 <sub>(0.091)</sub> | 0.589 <sub>(0.041)</sub> | 0.279 <sub>(0.017)</sub> | 0.368 <sub>(0.073)</sub>  |
| ALIGNN-Prop                                   | 0.573 <sub>(0.073)</sub> | <u>0.288(0.051)</u>      | 0.421 <sub>(0.117)</sub> | 0.586 <sub>(0.054)</sub> | 0.286 <sub>(0.025)</sub> | 0.369 <sub>(0.090)</sub>  |
| CHGNET-Z                                      | 0.634 <sub>(0.055)</sub> | 0.333 <sub>(0.038)</sub> | 0.300 <sub>(0.135)</sub> | 0.613 <sub>(0.022)</sub> | 0.299 <sub>(0.010)</sub> | 0.298 <sub>(0.056)</sub>  |
| CHGNET-Prop                                   | 0.635 <sub>(0.061)</sub> | 0.319 <sub>(0.040)</sub> | 0.325 <sub>(0.081)</sub> | 0.651 <sub>(0.042)</sub> | 0.316 <sub>(0.012)</sub> | 0.214 <sub>(0.091)</sub>  |
| LEFTNet-Z                                     | 0.614 <sub>(0.051)</sub> | 0.322 <sub>(0.043)</sub> | 0.361 <sub>(0.103)</sub> | 0.616 <sub>(0.020)</sub> | 0.307 <sub>(0.012)</sub> | 0.246 <sub>(0.130)</sub>  |
| LEFTNet-Prop                                  | 0.600 <sub>(0.104)</sub> | 0.304 <sub>(0.044)</sub> | 0.380 <sub>(0.183)</sub> | 0.612 <sub>(0.126)</sub> | 0.297 <sub>(0.029)</sub> | 0.256 <sub>(0.302)</sub>  |
| LR                                            | 0.650 <sub>(0.055)</sub> | 0.356 <sub>(0.049)</sub> | 0.357 <sub>(0.067)</sub> | 0.637 <sub>(0.014)</sub> | 0.332 <sub>(0.005)</sub> | 0.306 <sub>(0.008)</sub>  |
| RFR                                           | <b>0.541(0.047)</b>      | 0.296 <sub>(0.037)</sub> | <b>0.510(0.054)</b>      | <u>0.535(0.007)</u>      | 0.284 <sub>(0.005)</sub> | <u>0.453(0.016)</u>       |
| SVR                                           | <u>0.544(0.065)</u>      | 0.293 <sub>(0.051)</sub> | <u>0.480(0.098)</u>      | <b>0.510(0.013)</b>      | <b>0.261(0.007)</b>      | <b>0.497(0.018)</b>       |
| <i>With pretraining</i>                       |                          |                          |                          |                          |                          |                           |
| CGCNN                                         | 0.621 <sub>(0.070)</sub> | 0.322 <sub>(0.050)</sub> | 0.227 <sub>(0.286)</sub> | 0.603 <sub>(0.038)</sub> | 0.295 <sub>(0.014)</sub> | 0.235 <sub>(0.068)</sub>  |
| CartNet-Z                                     | 0.613 <sub>(0.057)</sub> | 0.323 <sub>(0.033)</sub> | 0.264 <sub>(0.234)</sub> | 0.606 <sub>(0.042)</sub> | 0.306 <sub>(0.009)</sub> | 0.273 <sub>(0.062)</sub>  |
| CartNet-Prop                                  | 0.607 <sub>(0.079)</sub> | 0.314 <sub>(0.040)</sub> | 0.154 <sub>(0.506)</sub> | 0.601 <sub>(0.019)</sub> | 0.289 <sub>(0.007)</sub> | 0.147 <sub>(0.222)</sub>  |
| ALIGNN-Z                                      | 0.557 <sub>(0.028)</sub> | 0.278 <sub>(0.027)</sub> | 0.459 <sub>(0.059)</sub> | 0.581 <sub>(0.031)</sub> | 0.263 <sub>(0.013)</sub> | 0.338 <sub>(0.053)</sub>  |
| ALIGNN-Prop                                   | 0.529 <sub>(0.047)</sub> | <b>0.266(0.032)</b>      | 0.488 <sub>(0.096)</sub> | 0.550 <sub>(0.030)</sub> | 0.280 <sub>(0.013)</sub> | 0.407 <sub>(0.051)</sub>  |
| CHGNET-Z                                      | 0.535 <sub>(0.053)</sub> | 0.289 <sub>(0.039)</sub> | 0.472 <sub>(0.105)</sub> | <u>0.486(0.005)</u>      | <u>0.242(0.004)</u>      | <u>0.487(0.014)</u>       |
| CHGNET-Prop                                   | <b>0.516(0.038)</b>      | 0.276 <sub>(0.033)</sub> | <u>0.506(0.091)</u>      | 0.525 <sub>(0.006)</sub> | 0.286 <sub>(0.004)</sub> | 0.406 <sub>(0.014)</sub>  |
| LEFTNet-Z                                     | <u>0.520(0.044)</u>      | 0.280 <sub>(0.040)</sub> | <b>0.512(0.101)</b>      | <b>0.485(0.007)</b>      | 0.242 <sub>(0.003)</sub> | <b>0.507(0.017)</b>       |
| LEFTNet-Prop                                  | <u>0.528(0.055)</u>      | <u>0.268(0.044)</u>      | 0.495 <sub>(0.089)</sub> | 0.494 <sub>(0.040)</sub> | <b>0.232(0.013)</b>      | 0.484 <sub>(0.061)</sub>  |

**Supplementary Table 13.** LOMO evaluation comparing Z encoding and atomic property embeddings with and without pretraining (MRAE).**With pretraining**

| Model   | Encoding | Antimonides | Arsenides | Carbides | Chalcogenides | Halides | Hydrides | Nitrides | Oxides | Phosphides | Silicides |
|---------|----------|-------------|-----------|----------|---------------|---------|----------|----------|--------|------------|-----------|
| CartNet | Z        | 0.716       | 0.401     | 0.250    | 0.318         | 0.422   | 0.542    | 0.824    | 0.371  | 0.435      | 0.619     |
|         | Prop     | 0.267       | 0.414     | 0.322    | 0.297         | 0.423   | 0.508    | 0.520    | 0.497  | 0.319      | 1.008     |
| ALIGNN  | Z        | 0.448       | 0.358     | 0.190    | 0.312         | 0.367   | 0.307    | 0.496    | 0.332  | 0.324      | 0.664     |
|         | Prop     | 0.248       | 0.381     | 0.272    | 0.312         | 0.402   | 0.394    | 0.509    | 0.340  | 0.394      | 0.383     |
| LEFTNet | Z        | 0.555       | 0.498     | 0.255    | 0.269         | 0.363   | 0.299    | 0.488    | 0.286  | 0.369      | 0.896     |
|         | Prop     | 0.309       | 0.348     | 0.271    | 0.275         | 0.334   | 0.222    | 0.520    | 0.294  | 0.334      | 0.346     |
| CHGNet  | Z        | 0.443       | 0.470     | 0.236    | 0.279         | 0.410   | 0.355    | 0.444    | 0.287  | 0.369      | 0.972     |
|         | Prop     | 0.333       | 0.387     | 0.266    | 0.264         | 0.414   | 0.297    | 0.591    | 0.289  | 0.289      | 0.692     |

**Without pretraining**

| Model   | Encoding | Antimonides | Arsenides | Carbides | Chalcogenides | Halides | Hydrides | Nitrides | Oxides | Phosphides | Silicides |
|---------|----------|-------------|-----------|----------|---------------|---------|----------|----------|--------|------------|-----------|
| CartNet | Z        | 0.387       | 0.358     | 0.106    | 0.365         | 0.370   | 0.379    | 0.467    | 0.351  | 0.323      | 1.072     |
|         | Prop     | 0.435       | 0.498     | 0.121    | 0.359         | 0.387   | 0.488    | 0.421    | 0.361  | 0.244      | 0.907     |
| ALIGNN  | Z        | 0.350       | 0.289     | 0.207    | 0.342         | 0.449   | 0.392    | 0.408    | 0.314  | 0.376      | 0.400     |
|         | Prop     | 0.350       | 0.289     | 0.207    | 0.342         | 0.449   | 0.392    | 0.408    | 0.314  | 0.376      | 0.400     |
| LEFTNet | Z        | 0.687       | 0.620     | 0.199    | 0.447         | 0.441   | 0.395    | 0.465    | 0.334  | 0.291      | 0.457     |
|         | Prop     | 0.500       | 0.438     | 0.199    | 0.327         | 0.507   | 0.364    | 0.453    | 0.325  | 0.333      | 0.540     |
| CHGNet  | Z        | 0.376       | 0.426     | 0.157    | 0.372         | 0.385   | 0.427    | 0.468    | 0.344  | 0.388      | 0.360     |
|         | Prop     | 0.349       | 0.384     | 0.159    | 0.378         | 0.407   | 0.376    | 0.487    | 0.346  | 0.272      | 0.306     |

## 57 S7 Classical machine learning baselines on learned representations

58 We considered linear regression (LR), random forest regression (RFR) and support vector regression (SVR), representing linear,  
59 kernel-based, and tree-based learning paradigms, respectively. These models are used as probes to assess how much predictive  
60 signal is already encoded in the learned representation. We evaluated the models under the random split (Supplementary  
61 Figure 7a), feature-based split (Supplementary Figure 7b), periodic group split as a representative chemistry-based split  
62 (Supplementary Figure 7c), and crystal-system split as a structure-based split (Supplementary Figure 7d).

63 Across all evaluated tasks, we observed that nonlinear modeling (SVR and RFR) consistently outperformed LR. This  
64 indicates that linear mappings are insufficient to exploit the predictive information contained in the embedding fully. Under  
65 feature-based OOD, nonlinear models maintain strong performance, while the LR fails the task. This suggests that the predictive  
66 information in the embeddings retains local consistency in the held-out set, reflecting the role of local chemical and coordination  
67 motifs in determining electronic structure.

68 Among the nonlinear models, their relative strengths depend on the difficulty of the task. Under relatively easy settings, such  
69 as random and crystal-system splits, SVR achieves slightly better performance, likely benefiting from its smooth kernel-based  
70 interpolation. In contrast, under more challenging OOD scenarios, particularly feature-based and periodic-group splits, RFR  
71 exhibits stronger robustness, suggesting that segmentation-based models generalize more reliably when test samples exceed the  
72 training set.

73 At the same time, the performance of classical models, sometimes even rivaling or surpassing certain GNNs, should be  
74 interpreted with caution. These results do not directly indicate whether such models can capture material physics. Because the  
75 encoding is obtained at the compound level by averaging the atomic environment, the model acquires not an explicit crystal  
76 geometry, but rather an aggregated representation of structural information. Instead, these results indicate that the predictive  
77 information encoded in the learned representation is strongly correlated with the bandgap and can be effectively exploited for  
78 estimation by relatively simple models.

## 79 S8 Experimental results on atomic encoding SHAP values of SVR

80 This section supplements Fig. 5 by providing the complete SHAP summary tables for the SVR model across all encoding  
81 features. The features are grouped into three segments: atom-level self features, neighbor-aggregated features, and radial basis  
82 function (RBF) distance features. For each feature, we report the mean SHAP value and the empirical distribution of the  
83 corresponding feature values in the training set. Feature distributions are normalized at the material level, where 0 indicates that  
84 none of the atoms in a given material falls into the corresponding bin and 1 indicates that all atoms fall into that bin.

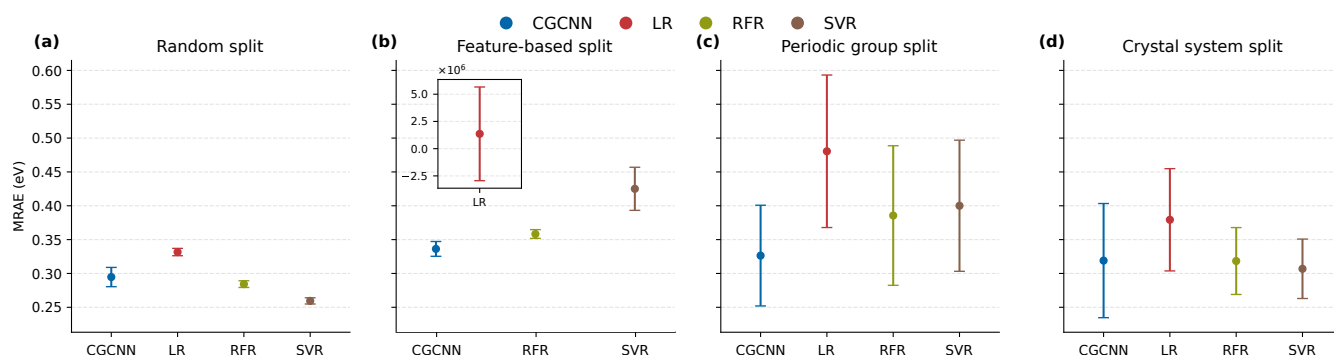

**Supplementary Figure 7.** Test MRAE of CGCNN and classical machine learning baselines (LR, RFR, SVR) under different data splits: **a**, random split, **b**, feature-based OOD split (LR shown in the inset due to the difference in scale), **c**, periodic group split, and **d**, crystal system split. Error bars indicate one standard deviation across runs.

| Idx | Property | mean SHAP | Distribution | Idx | Property           | mean SHAP | Distribution |
|-----|----------|-----------|--------------|-----|--------------------|-----------|--------------|
| 1   | Grp: 1   | -0.00015  |              | 25  | Per: 6             | -0.00364  |              |
| 2   | Grp: 2   | 0.00063   |              | 26  | Per: 7             | 0.00000   |              |
| 3   | Grp: 3   | 0.00024   |              | 27  | EN: [0.5, 0.85)    | 0.00000   |              |
| 4   | Grp: 4   | 0.00026   |              | 28  | EN: [0.85, 1.2)    | 0.00000   |              |
| 5   | Grp: 5   | -0.00010  |              | 29  | EN: [1.2, 1.55)    | 0.00299   |              |
| 6   | Grp: 6   | -0.00038  |              | 30  | EN: [1.55, 1.9)    | -0.00040  |              |
| 7   | Grp: 7   | 0.00000   |              | 31  | EN: [1.9, 2.25)    | -0.00799  |              |
| 8   | Grp: 8   | -0.00125  |              | 32  | EN: [2.25, 2.6)    | -0.00245  |              |
| 9   | Grp: 9   | -0.00118  |              | 33  | EN: [2.6, 2.95)    | 0.00000   |              |
| 10  | Grp: 10  | -0.00011  |              | 34  | EN: [2.95, 3.3)    | 0.00123   |              |
| 11  | Grp: 11  | -0.00014  |              | 35  | EN: [3.3, 3.65)    | 0.00006   |              |
| 12  | Grp: 12  | 0.00060   |              | 36  | EN: [3.65, 4]      | 0.00000   |              |
| 13  | Grp: 13  | 0.00100   |              | 37  | CR: [25, 47.5) pm  | 0.00000   |              |
| 14  | Grp: 14  | 0.00000   |              | 38  | CR: [47.5, 70) pm  | 0.00301   |              |
| 15  | Grp: 15  | -0.00004  |              | 39  | CR: [70, 92.5) pm  | -0.00011  |              |
| 16  | Grp: 16  | 0.00000   |              | 40  | CR: [92.5, 115) pm | 0.00080   |              |
| 17  | Grp: 17  | -0.00014  |              | 41  | CR: [115, 138) pm  | 0.00061   |              |
| 18  | Grp: 18  | 0.00065   |              | 42  | CR: [138, 160) pm  | -0.01044  |              |
| 19  | Grp: unk | 0.00000   |              | 43  | CR: [160, 182) pm  | 0.00000   |              |
| 20  | Per: 1   | 0.00000   |              | 44  | CR: [182, 205) pm  | 0.00000   |              |
| 21  | Per: 2   | 0.00318   |              | 45  | CR: [205, 228) pm  | 0.00000   |              |
| 22  | Per: 3   | 0.00110   |              | 46  | CR: [228, 250] pm  | 0.00000   |              |
| 23  | Per: 4   | -0.00545  |              | 47  | VE: 1              | 0.00049   |              |
| 24  | Per: 5   | -0.00512  |              | 48  | VE: 2              | 0.00000   |              |

(figure continued on next page)

| Idx | Property                 | mean SHAP | Distribution |
|-----|--------------------------|-----------|--------------|
| 49  | VE: 3                    | 0.00208   |              |
| 50  | VE: 4                    | -0.00104  |              |
| 51  | VE: 5                    | -0.00588  |              |
| 52  | VE: 6                    | -0.00354  |              |
| 53  | VE: 7                    | -0.00137  |              |
| 54  | VE: 8                    | -0.00128  |              |
| 55  | VE: 9                    | -0.00013  |              |
| 56  | VE: 10                   | 0.00000   |              |
| 57  | VE: 11                   | 0.00049   |              |
| 58  | VE: 12                   | 0.00000   |              |
| 59  | FIE: [3.67, 4.48) eV     | 0.00000   |              |
| 60  | FIE: [4.48, 5.47) eV     | -0.00000  |              |
| 61  | FIE: [5.47, 6.69) eV     | 0.00014   |              |
| 62  | FIE: [6.69, 8.17) eV     | -0.00344  |              |
| 63  | FIE: [8.17, 9.97) eV     | 0.00022   |              |
| 64  | FIE: [9.97, 12.2) eV     | -0.00119  |              |
| 65  | FIE: [12.2, 14.9) eV     | 0.00900   |              |
| 66  | FIE: [14.9, 18.2) eV     | 0.00000   |              |
| 67  | FIE: [18.2, 22.2) eV     | 0.00000   |              |
| 68  | FIE: [22.2, 27.1) eV     | 0.00000   |              |
| 69  | EA: [-3, -2.33) eV       | 0.00000   |              |
| 70  | EA: [-2.33, -1.66) eV    | 0.00000   |              |
| 71  | EA: [-1.66, -0.99) eV    | 0.00000   |              |
| 72  | EA: [-0.99, -0.32) eV    | 0.00000   |              |
| 73  | EA: [-0.32, 0.35) eV     | -0.00013  |              |
| 74  | EA: [0.35, 1.02) eV      | -0.00636  |              |
| 75  | EA: [1.02, 1.69) eV      | 0.00482   |              |
| 76  | EA: [1.69, 2.36) eV      | -0.00183  |              |
| 77  | EA: [2.36, 3.03) eV      | 0.00000   |              |
| 78  | EA: [3.03, 3.7] eV       | 0.00089   |              |
| 79  | Blk: s                   | 0.00561   |              |
| 80  | Blk: p                   | 0.00116   |              |
| 81  | Blk: d                   | -0.00334  |              |
| 82  | Blk: f                   | -0.00005  |              |
| 83  | AV: [4.48, 5.93) cm³/mol | -0.00010  |              |
| 84  | AV: [5.93, 7.85) cm³/mol | -0.00709  |              |
| 85  | AV: [7.85, 10.4) cm³/mol | -0.00011  |              |
| 86  | AV: [10.4, 13.7) cm³/mol | 0.00997   |              |
| 87  | AV: [13.7, 18.2) cm³/mol | -0.00191  |              |
| 88  | AV: [18.2, 24) cm³/mol   | -0.00536  |              |
| 89  | AV: [24, 31.8) cm³/mol   | 0.00000   |              |
| 90  | AV: [31.8, 42.1) cm³/mol | 0.00000   |              |
| 91  | AV: [42.1, 55.7) cm³/mol | 0.00000   |              |
| 92  | AV: [55.7, 73.7] cm³/mol | 0.00000   |              |

(figure continued on next page)

| Idx | Property | mean SHAP | Distribution | Idx | Property           | mean SHAP | Distribution |
|-----|----------|-----------|--------------|-----|--------------------|-----------|--------------|
| 93  | Grp: 1   | -0.00002  |              | 117 | Per: 6             | -0.00595  |              |
| 94  | Grp: 2   | 0.00256   |              | 118 | Per: 7             | 0.00000   |              |
| 95  | Grp: 3   | 0.00000   |              | 119 | EN: [0.5, 0.85)    | 0.00000   |              |
| 96  | Grp: 4   | 0.00015   |              | 120 | EN: [0.85, 1.2)    | -0.00029  |              |
| 97  | Grp: 5   | -0.00018  |              | 121 | EN: [1.2, 1.55)    | 0.00101   |              |
| 98  | Grp: 6   | -0.00030  |              | 122 | EN: [1.55, 1.9)    | -0.00011  |              |
| 99  | Grp: 7   | 0.00000   |              | 123 | EN: [1.9, 2.25)    | -0.01141  |              |
| 100 | Grp: 8   | -0.00049  |              | 124 | EN: [2.25, 2.6)    | -0.00073  |              |
| 101 | Grp: 9   | -0.00036  |              | 125 | EN: [2.6, 2.95)    | 0.00000   |              |
| 102 | Grp: 10  | -0.00005  |              | 126 | EN: [2.95, 3.3)    | 0.00142   |              |
| 103 | Grp: 11  | -0.00022  |              | 127 | EN: [3.3, 3.65)    | 0.00023   |              |
| 104 | Grp: 12  | 0.00043   |              | 128 | EN: [3.65, 4]      | 0.00000   |              |
| 105 | Grp: 13  | 0.00105   |              | 129 | CR: [25, 47.5) pm  | 0.00000   |              |
| 106 | Grp: 14  | -0.00013  |              | 130 | CR: [47.5, 70) pm  | 0.00259   |              |
| 107 | Grp: 15  | -0.00016  |              | 131 | CR: [70, 92.5) pm  | -0.00011  |              |
| 108 | Grp: 16  | -0.00081  |              | 132 | CR: [92.5, 115) pm | 0.00007   |              |
| 109 | Grp: 17  | 0.00002   |              | 133 | CR: [115, 138) pm  | -0.00021  |              |
| 110 | Grp: 18  | 0.00077   |              | 134 | CR: [138, 160) pm  | -0.01156  |              |
| 111 | Grp: unk | 0.00000   |              | 135 | CR: [160, 182) pm  | -0.00007  |              |
| 112 | Per: 1   | 0.00000   |              | 136 | CR: [182, 205) pm  | -0.00006  |              |
| 113 | Per: 2   | 0.00204   |              | 137 | CR: [205, 228) pm  | 0.00000   |              |
| 114 | Per: 3   | 0.00151   |              | 138 | CR: [228, 250] pm  | 0.00000   |              |
| 115 | Per: 4   | -0.00613  |              | 139 | VE: 1              | 0.00237   |              |
| 116 | Per: 5   | -0.00434  |              | 140 | VE: 2              | 0.00000   |              |

(figure continued on next page)

| Idx | Property                 | mean SHAP | Distribution |
|-----|--------------------------|-----------|--------------|
| 141 | VE: 3                    | 0.00097   |              |
| 142 | VE: 4                    | -0.00126  |              |
| 143 | VE: 5                    | -0.00907  |              |
| 144 | VE: 6                    | -0.00184  |              |
| 145 | VE: 7                    | -0.00026  |              |
| 146 | VE: 8                    | -0.00034  |              |
| 147 | VE: 9                    | 0.00000   |              |
| 148 | VE: 10                   | 0.00000   |              |
| 149 | VE: 11                   | 0.00022   |              |
| 150 | VE: 12                   | 0.00000   |              |
| 151 | FIE: [3.67, 4.48) eV     | 0.00000   |              |
| 152 | FIE: [4.48, 5.47) eV     | -0.00003  |              |
| 153 | FIE: [5.47, 6.69) eV     | 0.00000   |              |
| 154 | FIE: [6.69, 8.17) eV     | -0.00462  |              |
| 155 | FIE: [8.17, 9.97) eV     | 0.00003   |              |
| 156 | FIE: [9.97, 12.2) eV     | -0.00882  |              |
| 157 | FIE: [12.2, 14.9) eV     | 0.01007   |              |
| 158 | FIE: [14.9, 18.2) eV     | 0.00000   |              |
| 159 | FIE: [18.2, 22.2) eV     | 0.00000   |              |
| 160 | FIE: [22.2, 27.1) eV     | 0.00000   |              |
| 161 | EA: [-3, -2.33) eV       | 0.00000   |              |
| 162 | EA: [-2.33, -1.66) eV    | 0.00000   |              |
| 163 | EA: [-1.66, -0.99) eV    | 0.00000   |              |
| 164 | EA: [-0.99, -0.32) eV    | 0.00000   |              |
| 165 | EA: [-0.32, 0.35) eV     | -0.00056  |              |
| 166 | EA: [0.35, 1.02) eV      | -0.00554  |              |
| 167 | EA: [1.02, 1.69) eV      | 0.00499   |              |
| 168 | EA: [1.69, 2.36) eV      | -0.00231  |              |
| 169 | EA: [2.36, 3.03) eV      | 0.00000   |              |
| 170 | EA: [3.03, 3.7) eV       | 0.00087   |              |
| 171 | Blk: s                   | 0.00276   |              |
| 172 | Blk: p                   | -0.00021  |              |
| 173 | Blk: d                   | -0.00328  |              |
| 174 | Blk: f                   | -0.00002  |              |
| 175 | AV: [4.48, 5.93) cm³/mol | -0.00017  |              |
| 176 | AV: [5.93, 7.85) cm³/mol | -0.00180  |              |
| 177 | AV: [7.85, 10.4) cm³/mol | -0.00002  |              |
| 178 | AV: [10.4, 13.7) cm³/mol | 0.00477   |              |
| 179 | AV: [13.7, 18.2) cm³/mol | -0.00093  |              |
| 180 | AV: [18.2, 24) cm³/mol   | -0.00399  |              |
| 181 | AV: [24, 31.8) cm³/mol   | 0.00000   |              |
| 182 | AV: [31.8, 42.1) cm³/mol | 0.00000   |              |
| 183 | AV: [42.1, 55.7) cm³/mol | 0.00000   |              |
| 184 | AV: [55.7, 73.7) cm³/mol | 0.00002   |              |

(figure continued on next page)

| Idx | Property    | mean SHAP | Distribution                                                                          |
|-----|-------------|-----------|---------------------------------------------------------------------------------------|
| 185 | 0.00-0.20 Å | 0.00000   |    |
| 186 | 0.20-0.40 Å | 0.00000   |    |
| 187 | 0.40-0.60 Å | 0.00000   |    |
| 188 | 0.60-0.80 Å | 0.00000   |    |
| 189 | 0.80-1.00 Å | 0.00000   |    |
| 190 | 1.00-1.20 Å | -0.00001  |    |
| 191 | 1.20-1.40 Å | 0.00000   |    |
| 192 | 1.40-1.60 Å | 0.00000   |    |
| 193 | 1.60-1.80 Å | 0.00000   |    |
| 194 | 1.80-2.00 Å | 0.00024   |    |
| 195 | 2.00-2.20 Å | 0.00000   |   |
| 196 | 2.20-2.40 Å | -0.00003  |  |
| 197 | 2.40-2.60 Å | 0.00000   |  |
| 198 | 2.60-2.80 Å | -0.00040  |  |
| 199 | 2.80-3.00 Å | -0.00102  |  |
| 200 | 3.00-3.20 Å | 0.00019   |  |
| 201 | 3.20-3.40 Å | -0.00017  |  |
| 202 | 3.40-3.60 Å | -0.00109  |  |
| 203 | 3.60-3.80 Å | 0.00060   |  |
| 204 | 3.80-4.00 Å | 0.00056   |  |
| 205 | 4.00-4.20 Å | 0.00081   |  |
| 206 | 4.20-4.40 Å | 0.00003   |  |
| 207 | 4.40-4.60 Å | 0.00000   |  |
| 208 | 4.60-4.80 Å | 0.00000   |  |

(figure continued on next page)

| Idx | Property    | mean SHAP | Distribution |
|-----|-------------|-----------|--------------|
| 209 | 4.80-5.00 Å | 0.00000   |              |
| 210 | 5.00-5.20 Å | 0.00000   |              |
| 211 | 5.20-5.40 Å | 0.00000   |              |
| 212 | 5.40-5.60 Å | 0.00000   |              |
| 213 | 5.60-5.80 Å | 0.00000   |              |
| 214 | 5.80-6.00 Å | 0.00000   |              |
| 215 | 6.00-6.20 Å | 0.00000   |              |
| 216 | 6.20-6.40 Å | 0.00000   |              |
| 217 | 6.40-6.60 Å | 0.00000   |              |
| 218 | 6.60-6.80 Å | 0.00000   |              |
| 219 | 6.80-7.00 Å | 0.00000   |              |
| 220 | 7.00-7.20 Å | 0.00000   |              |

**Supplementary Figure 8.** Average SHAP value and distribution for SVR across all segments. The feature abbreviations are defined as follows: Grp (group number), Per (period number), EN (electronegativity), CR (covalent radius), VE (valence electrons), FIE (first ionization energy), EA (electron affinity), Blk (block), and AV (atomic volume). Features are grouped into three segments: self-atom features (Idx 1–92), neighbor-atom features (Idx 93–184), and encoded distance features (Idx 185–220). In each row, the Distribution panel shows the distribution of training-set values for the corresponding feature on the normalized 0–1 input scale; taller bars indicate that more training samples fall within that interval.
